# Supplementary material for: Sin3a is essential for the genome integrity and viability of pluripotent cells
Source: PubMed Central journal article supplement (PMC3334623; doi:10.1016/j.ydbio.2011.12.019), 2012-03-01
Supplement: mmc1.pdf [file mmc1.pdf]

## Supplementary Table 1. Primers

### qPCR Primers for Single ICM expression studies

| Gene                     | Forward (5'–3')          | Reverse (5'–3')         |
|--------------------------|--------------------------|-------------------------|
| <i>Sin3a</i>             | TTCCCTCTTCTGGTTCTCGGCCTC | GCTGGTGGATGGCACTAGGGC   |
| <i>Oct4</i>              | GGAAAGCAACTCAGAGGGAA     | TTCTAGCTCCTTCTGCAGGG    |
| <i>Nanog</i>             | ATGCCTGCAGTTTTTCATCC     | GAGGCAGGTCTTCAGAGGAA    |
| <i>E2f1</i>              | GGATGGGCTGGAGAAACAGTC    | CCATAGGAAGGACGCATACCC   |
| <i>Cyclin E1</i>         | CCAGCAGTAAGAAGGAGCAGC    | CCTCTCCATAGAGCACAGCATC  |
| <i>Cyclin B1</i>         | TGCCCTCCACAGTGTCTTAAATG  | GTGGCATTACAAGACAGGAGTGG |
| <i>Mcm2</i>              | GAAGGATCTGATGGACAAGGCC   | GGAAGTGGGAAGTGACGTAGG   |
| <i>p21<sup>Cip</sup></i> | AAAGTGTGCCGTTGTCTCTTCG   | AGTCAAAGTTCCACCGTTCTCG  |
| <i>Apaf1</i>             | GGCTCATCTGTTCTGTAGCTGG   | GTGTGAGCCACAGCCATCTTC   |
| <i>Dram</i>              | ATTGTGTGACAACTCTCTCTCTGG | TCTCGGGTACAAAGTCCAAGG   |

### Gene-specific forward primers for amplification of miRNA cDNAs

| miRNA             | Forward Primer (5'–3')           |
|-------------------|----------------------------------|
| <i>miR-16</i>     | ACACTCCAGCTGGGTAGCAGCACGTAAATA   |
| <i>miR-17-5p</i>  | ACACTCCAGCTGGGCAAAGTGCTTACAGTGCA |
| <i>miR-20a</i>    | ACACTCCAGCTGGGTAAAAGTGCTTATAGTGC |
| <i>miR-291-3p</i> | ACACTCCAGCTGGGAAAAGTGCTTCCACTTTG |
| <i>miR-292-3p</i> | ACACTCCAGCTGGGAAGTGCCGCCAGGTTTT  |
| <i>miR-293</i>    | ACACTCCAGCTGGGAGTGCCGCAGAGTTTG   |
| <i>miR-294</i>    | ACACTCCAGCTGGGAAAAGTGCTTCCCTTTT  |
| <i>miR-295</i>    | ACACTCCAGCTGGGAAAAGTGCTACTACTTTT |
| <i>let-7a</i>     | ACACTCCAGCTGGGTGAGGTAGTAGGTTG    |
