# Supplementary material for: Sin3a is essential for the genome integrity and viability of pluripotent cells
Source: PubMed Central journal article supplement (PMC3334623; doi:10.1016/j.ydbio.2011.12.019), 2012-03-01

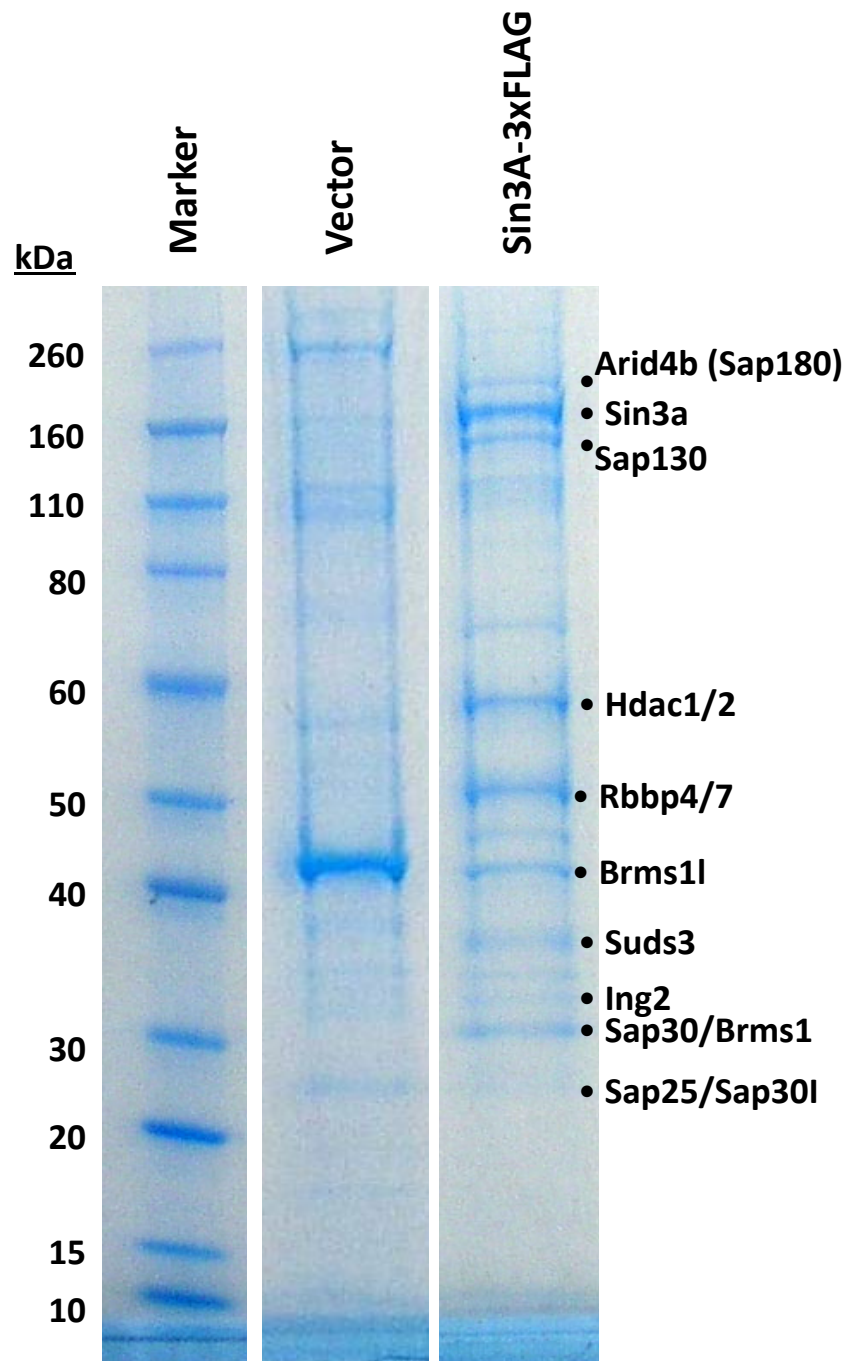

Supplement: mmc2.pdf [file mmc2.pdf]
